# Supplementary material for: Precisely tailoring dendritic α-Fe2O3 structures along [1010] directions
Source: Royal Society of Chemistry journal article supplement (doi:10.1039/c2ce06683a), 2012-01-01
Supplement: c2ce06683a.pdf [file c2ce06683a.pdf]

## Supporting information

### Precisely tailoring dendritic $\alpha$ -Fe<sub>2</sub>O<sub>3</sub> structures along [10-10] directions

Zhong Liu,<sup>a, c</sup> Baoliang Lv,<sup>\* a</sup> Dong Wu,<sup>a</sup> Yan Zhu,<sup>b</sup> Yuhan Sun<sup>\* a, b</sup>

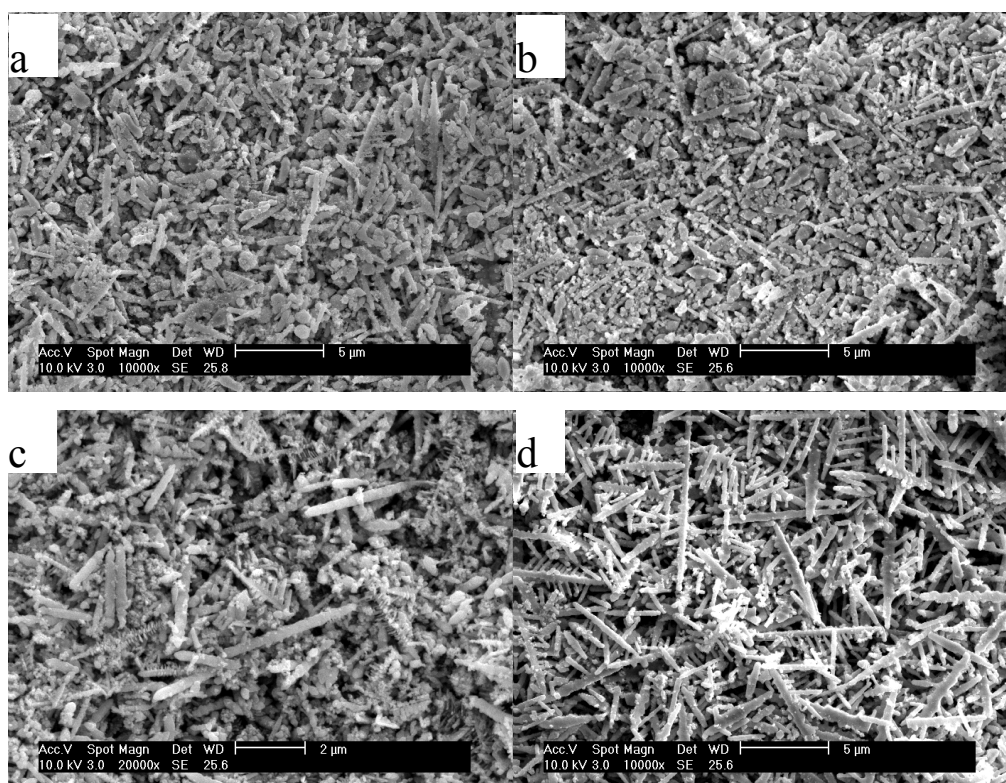

Figure S1: the morphologies of  $\alpha$ -Fe<sub>2</sub>O<sub>3</sub> obtained by vary the concentration of K<sub>3</sub>[Fe(CN)<sub>6</sub>] to (a)5, (b)20, (c)30, and (d)50 mM/L with adding benzoic acid (60 mM/L) and NaOH (60 mM/L) at 220 °C for 24h.

| Sample number | pH values       |                |
|---------------|-----------------|----------------|
|               | before reaction | after reaction |
| S1            | 8.31            | 9.20           |
| S2            | 12.14           | 9.22           |
| S3            | 12.30           | 9.26           |
| S4            | 12.42           | 9.35           |
| S5            | 12.94           | 9.48           |
| S6            | 13.12           | 9.56           |

Table S1: the pH values of solution obtained before and after reaction.
